# Supplementary material for: Structures of respiratory syncytial virus G bound to broadly reactive antibodies provide insights into vaccine design
Source: Springer Nature journal article supplement (doi:10.1038/s41598-025-92886-w), 2025-03-13
Supplement: MOESM1 [file 41598_2025_92886_MOESM1_ESM.pdf]

## Supplementary Information

### Structures of respiratory syncytial virus G bound to broadly-reactive antibodies provide insights into vaccine design

Maria G. Juarez<sup>a</sup>, Sara M. O'Rourke<sup>b</sup>, John V. Dzimianski<sup>b</sup>, Delia Gagnon<sup>b</sup>, Gabriel Penunuri<sup>b,c</sup>, Vitor H. B. Serrão<sup>d,e</sup>, Russell B. Corbett-Detig<sup>b,c</sup>, Lawrence M. Kauvar<sup>f</sup>, and Rebecca M. DuBois<sup>b#</sup>

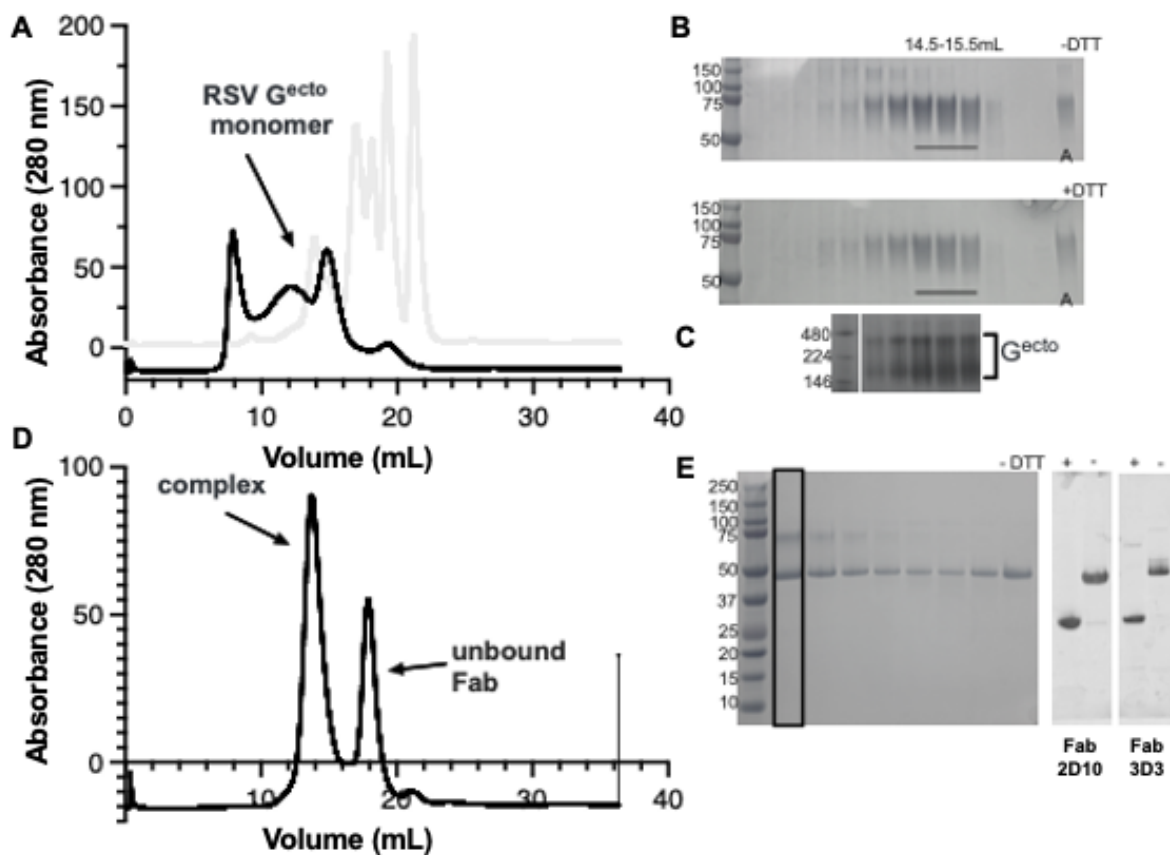

**Supplementary Figure 1.** (A) Affinity-purified RSV G<sup>ecto</sup> produced in a SimpleCell (Cosmc-KO) GALNT3+ CHO K1 cells was polished to remove aggregates by size exclusion chromatography on a Superose 6 increase 10/300 column in 50 mM Tris-Cl pH 7.5 and 300 mM NaCl. (B) Monomeric RSV G<sup>ecto</sup> was identified by denaturing electrophoresis of eluted protein, in the presence and absence of a reducing agent. (C) Novex Blue Native Page gel (Thermo-Fisher) of fractions 14.5-15.5 mL. Two distinct bands were identified; the higher MW moiety may represent protein decorated with complex charged N-glycans, and the lower band protein with less complex high-mannose type glycans. Unglycosylated protein has a predicted MW of ~30kDa. (D) Fab 3D3-RSV G<sup>ecto</sup>-Fab 2D10 complex was purified on a Superose 6 increase 10/300 column in 50 mM Tris-Cl pH 7.5 and 150 mM NaCl, verified on a denaturing Coomassie stained SDS-PAGE gel (E).

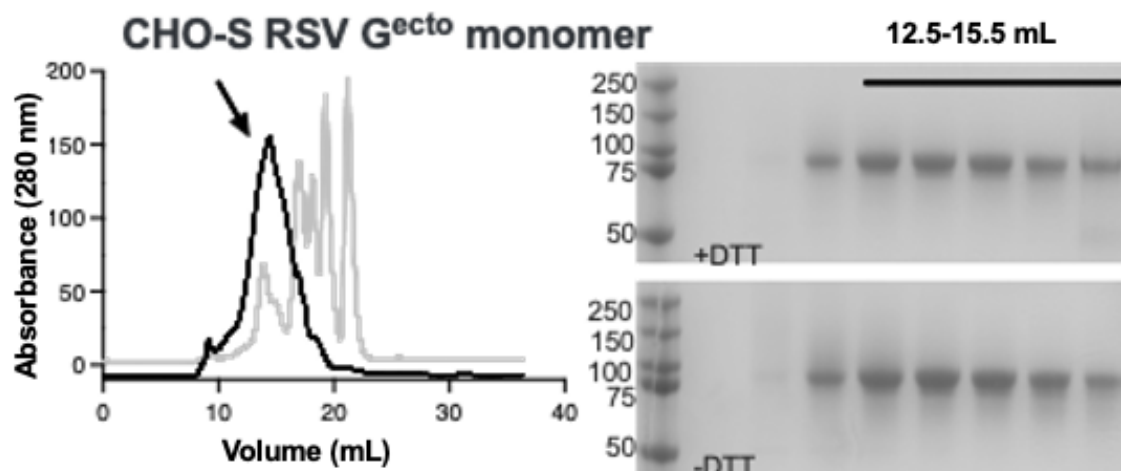

**Supplementary Figure 2.** Affinity purified RSV G<sup>ecto</sup> produced in CHO-S cells was polished on a Superose 6 increase 10/300 SEC column in 50 mM Tris-Cl pH 7.5 and 300 mM NaCl and verified on Coomassie stained SDS-PAGE gels.

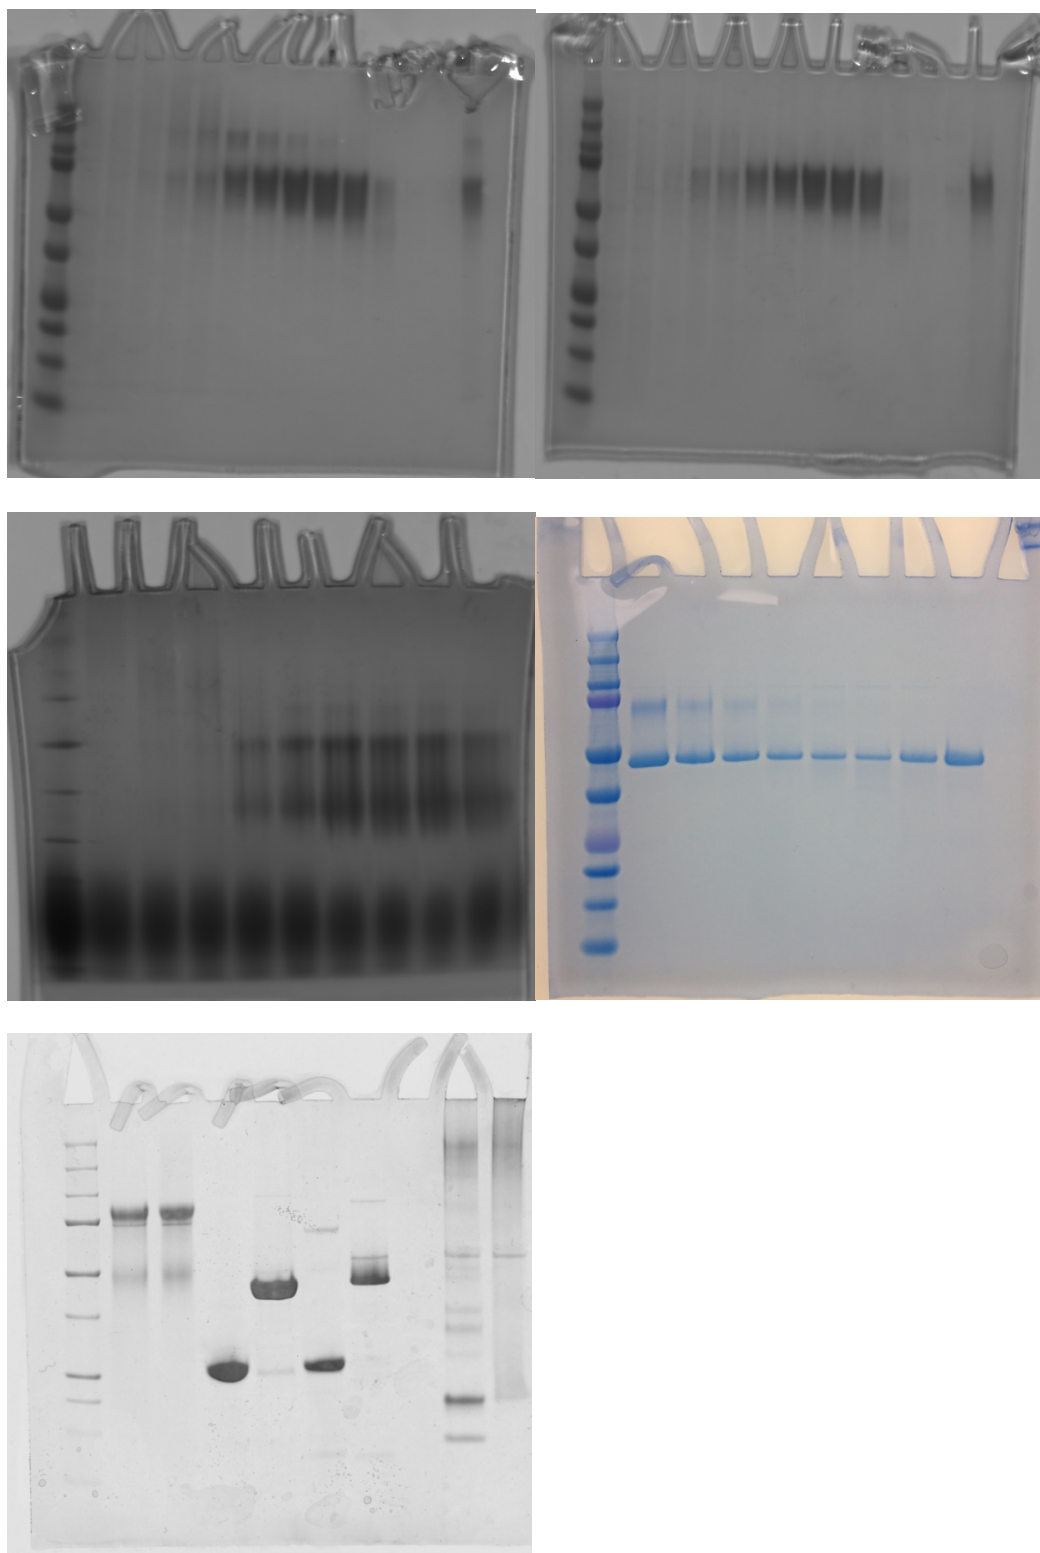

**Supplementary Figure 3.** Uncropped Coomassie stained SDS-PAGE gels from Supplementary Figure 1.

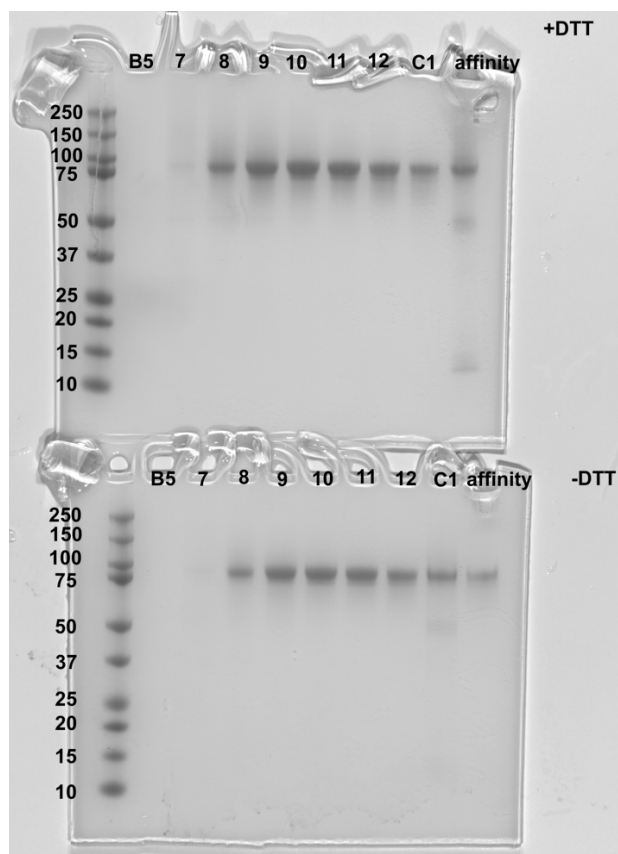

**Supplementary Figure 4.** Uncropped Coomassie stained SDS-PAGE gels from Supplementary Figure 2.
